# Supplementary material
Source: PubMed Central journal article supplement (PMC11072823)

# Supplementary Figure 1

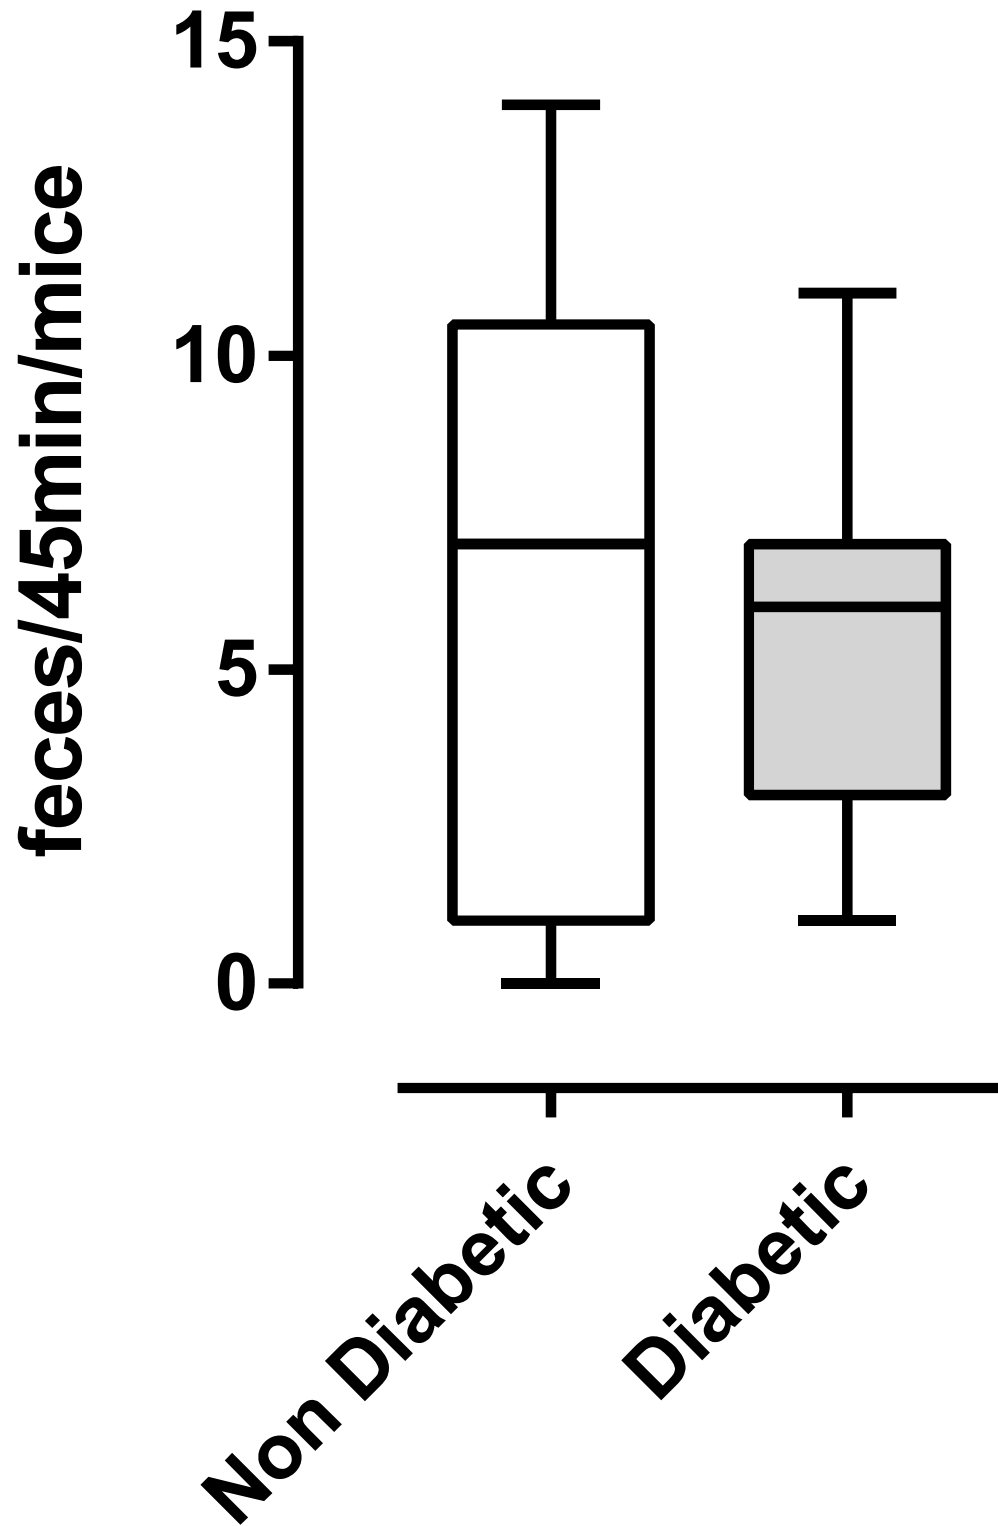

## Supplementary Figure 2

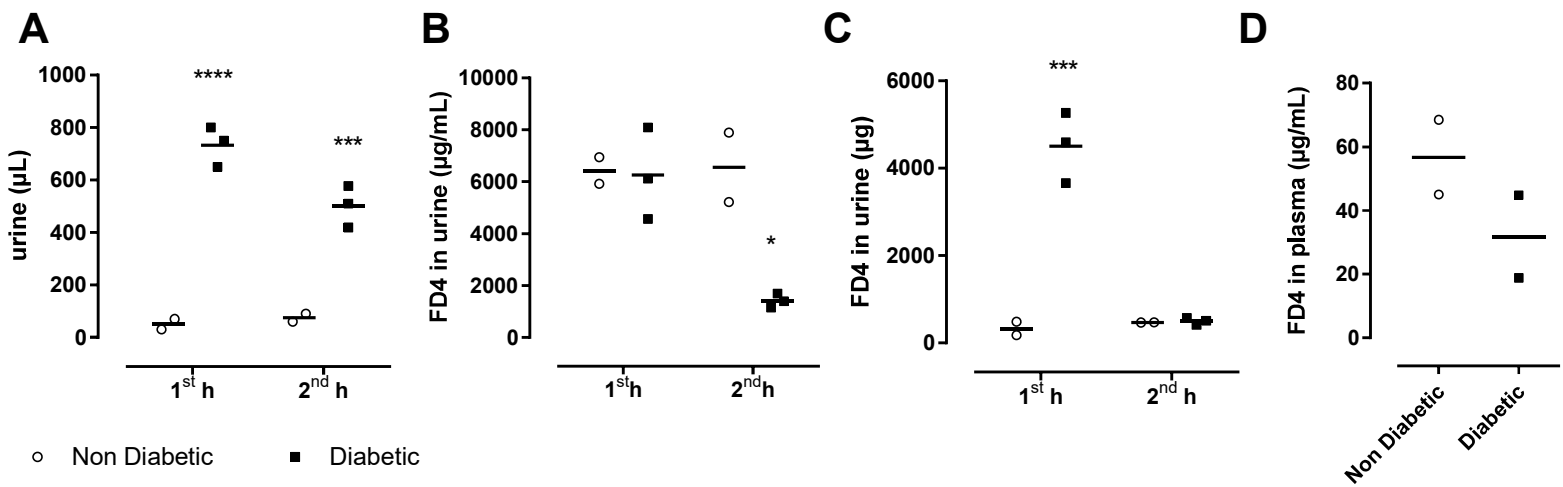

# Supplementary Figure 3

**A**

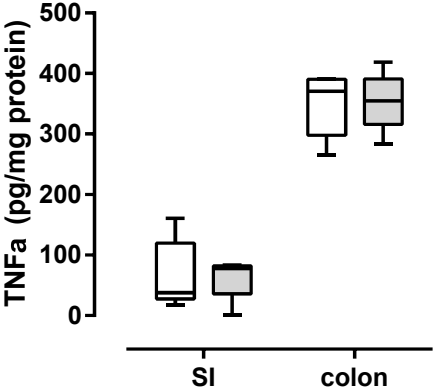

**B**

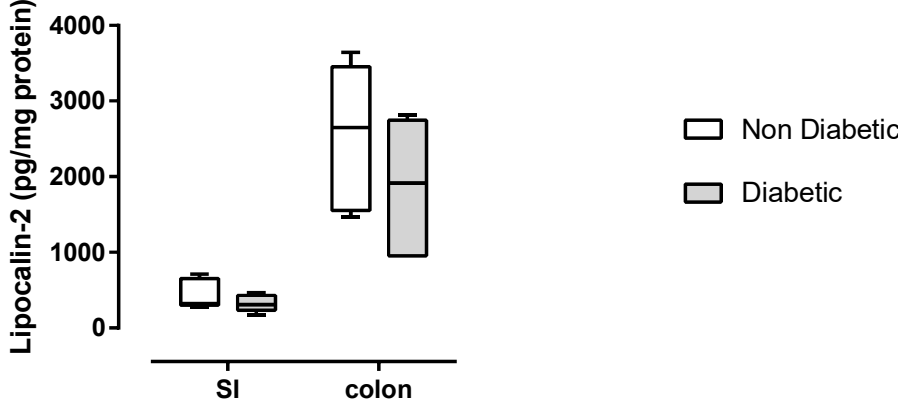

**C**

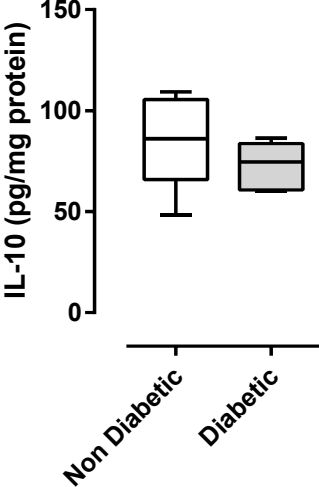

**D**

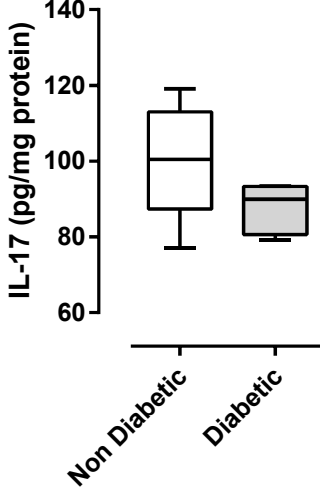

**E**

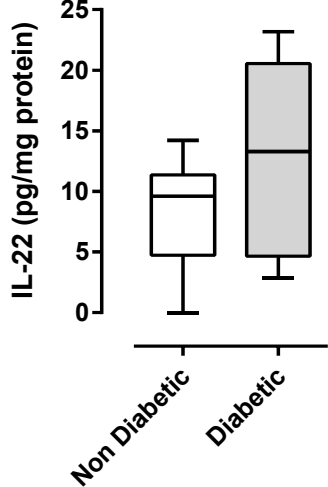

Supplement: 18_2021_4000_MOESM1_ESM.pdf [file 18_2021_4000_MOESM1_ESM.pdf]
